# Supplementary material for: Network Protein Interaction in the Link between Stroke and Periodontitis Interplay: A Pilot Bioinformatic Analysis
Source: Preprints.org preprint supplement (doi:10.20944/preprints202102.0062.v1), 2021-02-01
Supplement: Supplementary file 3 [file supplementary]

Appendix S1. Genes and their corresponding proteins for Periodontitis

| **Mapped gene** | **Reported trait** |
| --- | --- |
| GLT6D1 | Periodontitis |
| AL360006.1, KCNK1 | Periodontal microbiota |
| PKN2-AS1 | Periodontal microbiota |
| CLIC5, RUNX2 | Periodontal microbiota |
| Y_RNA, AC064802.1 | Periodontal microbiota |
| CAMTA1 | Periodontal microbiota |
| AF111167.2, LINC01220 | Periodontal microbiota |
| TENM2 | Periodontal microbiota |
| GRID1 | Periodontal microbiota |
| AL360006.1, KCNK1 | Periodontal microbiota |
| AC016751.2, EXTL2P1 | Periodontal microbiota |
| DAB2IP, AL596244.1 | Periodontal microbiota |
| Y_RNA, NAMPTP1 | Periodontal microbiota |
| FAM166C, OTOF | Periodontal microbiota |
| FBXO38 | Periodontal microbiota |
| UHRF2 | Periodontal microbiota |
| TBC1D1 | Periodontal microbiota |
| AC003044.1 | Periodontitis |
| AL136967.2, FOXP4-AS1 | Periodontitis |
| ADGRE1 | Periodontitis |
| TTC6 | Periodontitis (CDC/AAP) |
| GPN1 | Periodontitis (CDC/AAP) |
| HLA-DOA | Periodontitis (CDC/AAP) |
| ITGA8 | Periodontitis (CDC/AAP) |
| ERGIC1 | Periodontitis (CDC/AAP) |
| LRP1B | Periodontitis (CDC/AAP) |
| PRB2, AC078950.1 | Periodontitis (CDC/AAP) |
| C10orf91, AL451069.1 | Periodontitis (CDC/AAP) |
| AL161449.2, Y_RNA | Periodontitis (CDC/AAP) |
| CEP295NL, TIMP2 | Periodontitis (CDC/AAP) |
| ACTN2 | Periodontitis (CDC/AAP) |
| KDM4B | Periodontitis (CDC/AAP) |
| LINC01828, AC007403.1 | Periodontitis (CDC/AAP) |
| AC022239.2, LINC00208 | Periodontitis (CDC/AAP) |
| AC015987.1 | Periodontitis (CDC/AAP) |
| MFSD1 | Periodontitis (CDC/AAP) |
| LINC01262, HSP90AA4P | Periodontitis (CDC/AAP) |
| IGF2R | Periodontitis (CDC/AAP) |
| WDR73, SCAND2P | Periodontitis (CDC/AAP) |
| PARP15 | Periodontitis (CDC/AAP) |
| RPL35AP19, AC068413.1 | Periodontitis (CDC/AAP) |
| CSMD1 | Periodontitis (CDC/AAP) |
| ETNK2 | Periodontitis (CDC/AAP) |
| AC010468.1, AC010468.3 | Periodontitis (PAL4Q3) |
| THSD4 | Periodontitis (PAL4Q3) |
| ROBO2 | Periodontitis (PAL4Q3) |
| LINC01748, LINC02778 | Periodontitis (PAL4Q3) |
| DEFA10P, DEFA9P | Periodontitis (PAL4Q3) |
| NKAIN3 | Periodontitis (PAL4Q3) |
| PPIAP65, LINC01854 | Periodontitis (PAL4Q3) |
| IGLV10-54 | Periodontitis (PAL4Q3) |
| ROCK1P1 | Periodontitis (Mean PAL) |
| AC055874.1 | Periodontitis (Mean PAL) |
| SMURF2 | Periodontitis (Mean PAL) |
| AC027229.1, RN7SL97P | Periodontitis (Mean PAL) |
| AC015871.1, ST20-MTHFS | Periodontitis (Mean PAL) |
| THSD4 | Periodontitis (Mean PAL) |
| ZNF579 | Periodontitis (Mean PAL) |
| ABCA1 | Periodontitis (Mean PAL) |
| MIR8052, BAK1P2 | Periodontitis (Mean PAL) |
| BCORL1, AL034405.1 | Periodontitis (Mean PAL) |
| BIRC5 | Periodontitis (Mean PAL) |
| AC063949.1, C12orf74 | Periodontitis (Mean PAL) |
| ST20-AS1, AC015871.2 | Periodontitis (Mean PAL) |
| CDH13, AC009063.2 | Periodontitis (Mean PAL) |
| AC114324.2, LINC02062 | Periodontitis (Mean PAL) |
| ICE2P2, NDUFA5P5 | Periodontitis (Mean PAL) |
| AP001042.1 | Periodontitis (Mean PAL) |
| AC093534.2, RPL35AP15 | Periodontitis (DPAL) |
| DAOA-AS1, AL138954.1 | Periodontitis (DPAL) |
| GRIK1 | Periodontitis (DPAL) |
| AC093534.2, RPL35AP15 | Periodontitis (DPAL) |
| NLGN1 | Periodontitis (DPAL) |
| AC006059.2, CCDC13 | Periodontitis (DPAL) |
| PWRN1, AC090983.2 | Periodontitis (DPAL) |
| SUMF1 | Periodontitis (DPAL) |
| LBP | Periodontitis (DPAL) |
| LINC02022 | Periodontitis (DPAL) |
| AC005208.1, KCNJ16 | Periodontitis (DPAL) |
| SCN2A | Periodontitis (DPAL) |
| TGIF1 | Periodontitis (DPAL) |
| NPAP1, AC090983.2, PWRN1 | Periodontitis (DPAL) |
| ZFPM2 | Periodontitis (DPAL) |
| PPIAP65, LINC01854 | Periodontitis (PAL4Q3) |
| LINC00907 | Periodontitis (PAL4Q3) |
| RBFOX1 | Periodontitis (PAL4Q3) |
| LINC01933 | Periodontitis (PAL4Q3) |
| HMGB1P5, AC092421.1 | Periodontitis (PAL4Q3) |
| DEFA10P, DEFA9P | Periodontitis (PAL4Q3) |
| LINC00907 | Periodontitis (PAL4Q3) |
| THSD4 | Periodontitis (PAL4Q3) |
| FAM135B | Periodontitis (PAL4Q3) |
| AC010468.1, CAMK4 | Periodontitis (PAL4Q3) |
| FAM126A | Periodontitis (Mean PAL) |
| NKAIN2 | Periodontitis (Mean PAL) |
| PSMA8 | Periodontitis (Mean PAL) |
| ERC2 | Periodontitis (Mean PAL) |
| MIR8052, BAK1P2 | Periodontitis (Mean PAL) |
| ACTN1 | Periodontitis (Mean PAL) |
| DKK1, RPL31P44 | Periodontitis (Mean PAL) |
| AL591501.1 | Periodontitis (Mean PAL) |
| FIZ1 | Periodontitis (Mean PAL) |
| HMX3, ACADSB | Periodontitis (Mean PAL) |
| HS6ST2 | Periodontitis (Mean PAL) |
| LINC01278 | Periodontitis (Mean PAL) |
| AC090666.1, LINC01919 | Periodontitis (Mean PAL) |
| NKAIN2 | Periodontitis (Mean PAL) |
| HNRNPA1P58, NRSN1 | Periodontitis (Mean PAL) |
| AC123023.1, LINC01811 | Periodontitis (Mean PAL) |
| GDF15 | Periodontitis (Mean PAL) |
| NPM1P2 | Periodontitis (Mean PAL) |
| AC063965.1, PTEN | Periodontitis (Mean PAL) |
| PTPRT | Periodontitis (Mean PAL) |
| CSMD1 | Periodontitis (CDC/AAP) |
| RGMA, AC108457.1 | Periodontitis (CDC/AAP) |
| AC022239.2, LINC00208 | Periodontitis (CDC/AAP) |
| AC022239.2, LINC00208 | Periodontitis (CDC/AAP) |
| KDM4B | Periodontitis (CDC/AAP) |
| AC090365.1, CDH2 | Periodontal disease-related phenotype (Socransky) |
| FHOD3 | Periodontal disease-related phenotype (Socransky) |
| LINC02855, HAS2-AS1 | Periodontal disease-related phenotype (Socransky) |
| HSP90AB2P, U6 | Periodontal disease-related phenotype (Socransky) |
| GVINP1 | Periodontal disease-related phenotype (Socransky) |
| AL356124.1 | Periodontal disease-related phenotype (Socransky) |
| HSP90AB2P, U6 | Periodontal disease-related phenotype (Socransky) |
| OSBPL10 | Periodontal disease-related phenotype (Socransky) |
| AL355838.1 | Periodontal disease-related phenotype (Socransky) |
| CDKL1 | Periodontal disease-related phenotype (Socransky) |
| CRACR2A | Chronic periodontitis (localised) |
| KCNQ5 | Periodontitis |
| GPR141, EPDR1 | Periodontitis |
| C5AR1 | Chronic periodontitis |
| DLG2 | Chronic periodontitis |
| SIGLEC5, AC018755.2 | Periodontitis |
| AP000959.1, MAPK6P2 | Periodontitis |
| RNU6-675P, TEX51 | Periodontitis |
| MIR297, LYPLA1P2 | Periodontitis |
| AL109933.3 | Periodontitis |
| LINC01239, AL391117.1 | Periodontitis |
| AL354916.1, CUX2P1 | Periodontitis |
| NUDT5 | Periodontitis |
| AC004241.1 | Periodontitis |
| HUNK | Periodontitis |

Appendix S2. Genes and their corresponding proteins for stroke

| **Mapped gene** | **Reported trait** |
| --- | --- |
| ZFHX3 | Cardioembolic stroke (CCSp classification) |
| GNAO1 | Cardioembolic stroke (CCSp classification) |
| LINC01438, PITX2 | Cardioembolic stroke (CCSp classification) |
| ZFHX3 | Cardioembolic stroke (TOAST classification) |
| LINC01438, PITX2 | Cardioembolic stroke (TOAST classification) |
| ZFHX3 | Cardioembolic stroke (CCS and TOAST classification) |
| PHF20 | Cardioembolic stroke (CCS and TOAST classification) |
| LINC01438, PITX2 | Cardioembolic stroke (CCS and TOAST classification) |
| ZFHX3 | Cardioembolic stroke (CCS or TOAST classification) |
| LINC01438, PITX2 | Cardioembolic stroke (CCS or TOAST classification) |
| ZFHX3 | Cardioembolic stroke (CCSc classification) |
| AC010230.1, AC094104.2 | Cardioembolic stroke (CCSc classification) |
| TTBK1, SLC22A7 | Cardioembolic stroke (CCSc classification) |
| LINC01438, PITX2 | Cardioembolic stroke (CCSc classification) |
| ATG7 | Small vessel stroke |
| ATG7 | Small vessel stroke |
| KNG1, AC068631.1 | Small vessel stroke |
| FAT4, ANKRD50 | Small vessel stroke |
| LINC02487, AL009178.1 | Small vessel stroke |
| ATP6V1C1, MTND1P5 | Small vessel stroke |
| DIO2-AS1 | Small vessel stroke |
| SH2B3, ATXN2 | Small vessel stroke (CCSp classification) |
| BRAP, ATXN2-AS | Small vessel stroke (CCSp classification) |
| CAMK2D | Small vessel stroke (CCS and TOAST classification) |
| SH2B3, ATXN2 | Small vessel stroke (CCS or TOAST classification) |
| HDAC9, TWIST1 | Large artery stroke (CCSp classification)j |
| AL049825.1, LINC01765 | Large artery stroke (CCSp classification)j |
| HDAC9, TWIST1 | Large artery stroke (TOAST classification) |
| LINC01492 | Large artery stroke (TOAST classification) |
| HDAC9, TWIST1 | Large artery stroke (CCS and TOAST classification) |
| AL049825.1, LINC01765 | Large artery stroke (CCS and TOAST classification) |
| HDAC9, TWIST1 | Large artery stroke (CCS or TOAST classification) |
| AL049825.1, LINC01765 | Large artery stroke (CCS or TOAST classification) |
| AL109838.1, BTBD3 | 3-month functional outcome in lacunar ischaemic stroke (modified Rankin score) |
| AL133240.1, CPSF2 | 3-month functional outcome in lacunar ischaemic stroke (modified Rankin score) |
| SERPINA1 | Large artery stroke |
| HDAC9 | Large artery stroke |
| ACP1 | Large artery stroke |
| AC007318.2, AC007318.3 | Large artery stroke |
| SH3YL1 | Large artery stroke |
| DTL | Large artery stroke |
| MCHR1 | Large artery stroke |
| CARD9 | Large artery stroke |
| ADAMTS2 | Stroke (pediatric) |
| ADAMTS12 | Stroke (pediatric) |
| TRIM29 | Stroke (pediatric) |
| TRIM29 | Stroke (pediatric) |
| PITX2, LINC01438 | Stroke (ischemic) |
| IMPA2 | Stroke |
| LINC00458, LINC00558 | Stroke |
| CRYBG1 | Stroke |
| RPL36AP26, AC006041.2 | Stroke |
| PTPRG | Stroke |
| SPINK2 | Stroke |
| TGFBI | Stroke |
| AL356094.2, AL356094.1 | Stroke |
| LINC00709, AC044784.1 | Stroke |
| WDFY4 | Stroke |
| MICAL2 | Stroke |
| ALDH1A2 | Stroke |
| CHD3 | Stroke |
| AP001347.1 | Stroke |
| CLDN17, AF096876.1 | Stroke |
| AL606519.1 | Stroke |
| RNU6-1180P, IL1RN | Stroke |
| PTPRG | Stroke |
| LINC01411, SUMO2P6 | Stroke |
| AC016573.1 | Stroke |
| AL356094.2, AL356094.1 | Stroke |
| HDAC9 | Stroke |
| LINC00709, AC044784.1 | Stroke |
| WDFY4 | Stroke |
| MIR100HG | Stroke |
| AC018659.2, RMST | Stroke |
| AL356807.1, MTND4P33 | Stroke |
| AL356807.1 | Stroke |
| ALDH1A2 | Stroke |
| AP001347.1 | Stroke |
| CLDN17, AF096876.1 | Stroke |
| NOS3 | Stroke |
| COL4A1 | Stroke |
| AP001407.1, DYRK1A | Stroke |
| LINC02455, NINJ2-AS1 | Stroke |
| LINC02455, NINJ2-AS1 | Stroke |
| LINC02455, NINJ2-AS1 | Stroke |
| LINC02455, NINJ2-AS1 | Stroke |
| AC244502.1 | Cardiovascular death, myocardial infarction or stroke in response to clopidogrel treatment |
| RNU6-144P, ZYXP1 | Cardiovascular death, myocardial infarction or stroke in response to clopidogrel treatment |
| PRKG1 | Cardiovascular death, myocardial infarction or stroke in response to clopidogrel treatment |
| WFDC1 | Cardiovascular death, myocardial infarction or stroke in response to clopidogrel treatment |
| LHFPL2 | Cardiovascular death, myocardial infarction or stroke in response to clopidogrel treatment |
| MICAL2 | Cardiovascular death, myocardial infarction or stroke in response to clopidogrel treatment |
| HDAC9 | Stroke |
| HDAC9, TWIST1 | Stroke (ischemic) |
| HDAC9, TWIST1 | Stroke (ischemic) |
| LINC01438 | Stroke (ischemic) |
| LINC01438 | Stroke (ischemic) |
| ZFHX3 | Stroke (ischemic) |
| SPSB4 | Stroke (ischemic) |
| ASB3 | Stroke (ischemic) |
| AC002996.1, ALDH2 | Stroke (ischemic) |
| BSX, AP003040.1 | Age-related diseases and mortality |
| AC125807.2, AC125807.1 | Age-related diseases and mortality |
| GRHL1 | Age-related diseases and mortality |
| AC079248.1, RNU7-2P | Age-related diseases and mortality |
| ITPK1 | Age-related diseases and mortality |
| SEMA5B | Age-related diseases and mortality |
| ZFHX3 | Age-related diseases and mortality |
| DNAH2 | Age-related diseases and mortality |
| AC003986.1, AC007091.1 | Age-related diseases and mortality |
| AKR1B1P6, THEMIS3P | Age-related diseases and mortality |
| CDKN2B-AS1 | Age-related diseases and mortality |
| TMPRSS2, MX1 | Age-related diseases and mortality |
| ANKRD26, FAM238C | Age-related diseases and mortality |
| TCF7L2 | Age-related diseases and mortality |
| FADS1, FADS2 | Age-related diseases, mortality and associated endophenotypes |
| ZPR1 | Age-related diseases, mortality and associated endophenotypes |
| SIK3 | Age-related diseases, mortality and associated endophenotypes |
| BSX, AP003040.1 | Age-related diseases, mortality and associated endophenotypes |
| AC125807.2, AC125807.1 | Age-related diseases, mortality and associated endophenotypes |
| ATP2B1 | Age-related diseases, mortality and associated endophenotypes |
| ZCCHC8 | Age-related diseases, mortality and associated endophenotypes |
| ITPK1 | Age-related diseases, mortality and associated endophenotypes |
| ALDH1A2, LIPC, LIPC-AS1 | Age-related diseases, mortality and associated endophenotypes |
| FTO | Age-related diseases, mortality and associated endophenotypes |
| HERPUD1, CETP | Age-related diseases, mortality and associated endophenotypes |
| ZFHX3 | Age-related diseases, mortality and associated endophenotypes |
| AKR1B1P6, THEMIS3P | Age-related diseases, mortality and associated endophenotypes |
| SUGP1 | Age-related diseases, mortality and associated endophenotypes |
| APOC1, APOC1P1 | Age-related diseases, mortality and associated endophenotypes |
| AC243964.2, BCL3 | Age-related diseases, mortality and associated endophenotypes |
| CELSR2 | Age-related diseases, mortality and associated endophenotypes |
| GRHL1 | Age-related diseases, mortality and associated endophenotypes |
| AC010872.2, APOB | Age-related diseases, mortality and associated endophenotypes |
| TDRD15, AC067959.1 | Age-related diseases, mortality and associated endophenotypes |
| SLC30A3 | Age-related diseases, mortality and associated endophenotypes |
| NRBP1, PPM1G | Age-related diseases, mortality and associated endophenotypes |
| GCKR | Age-related diseases, mortality and associated endophenotypes |
| AC079248.1, RNU7-2P | Age-related diseases, mortality and associated endophenotypes |
| ABCA12 | Age-related diseases, mortality and associated endophenotypes |
| SEMA5B | Age-related diseases, mortality and associated endophenotypes |
| SLC39A8 | Age-related diseases, mortality and associated endophenotypes |
| MIR297, LINC01438 | Age-related diseases, mortality and associated endophenotypes |
| MAML3 | Age-related diseases, mortality and associated endophenotypes |
| AC008897.2 | Age-related diseases, mortality and associated endophenotypes |
| CERT1 | Age-related diseases, mortality and associated endophenotypes |
| POLK | Age-related diseases, mortality and associated endophenotypes |
| POC5 | Age-related diseases, mortality and associated endophenotypes |
| AC003986.1, AC007091.1 | Age-related diseases, mortality and associated endophenotypes |
| BAZ1B | Age-related diseases, mortality and associated endophenotypes |
| VPS37D, MLXIPL | Age-related diseases, mortality and associated endophenotypes |
| AC100802.1, LPL | Age-related diseases, mortality and associated endophenotypes |
| AC091114.1, TRIB1 | Age-related diseases, mortality and associated endophenotypes |
| CDKN2B-AS1 | Age-related diseases, mortality and associated endophenotypes |
| PLCG1 | Age-related diseases, mortality and associated endophenotypes |
| ADI1P1, ZHX3 | Age-related diseases, mortality and associated endophenotypes |
| TMPRSS2, MX1 | Age-related diseases, mortality and associated endophenotypes |
| ANKRD26, FAM238C | Age-related diseases, mortality and associated endophenotypes |
| TCF7L2 | Age-related diseases, mortality and associated endophenotypes |
| LINC01394, AL034346.1 | Stroke |
| MRPL58, RNU6-362P | Alzheimer's disease or small vessel stroke |
| FGA, FGB | Stroke |
| PDE3A | Stroke |
| CDKN2B-AS1 | Stroke |
| SMARCA4 | Stroke |
| CASZ1 | Stroke |
| COL4A1 | Stroke |
| LRCH1 | Stroke |
| PMF1-BGLAP, PMF1 | Stroke |
| AC010255.3 | Stroke |
| WNT2B | Stroke |
| AC092720.1, AC092720.3 | Stroke |
| ZFHX3 | Stroke |
| LINC01438, PITX2 | Stroke |
| TTBK1, SLC22A7 | Stroke |
| BOLA3P1, RNU7-159P | Stroke |
| HDAC9, TWIST1 | Stroke |
| ILF3 | Stroke |
| SH3PXD2A, AL133355.1 | Stroke |
| SH2B3, ATXN2 | Stroke |
| AC017007.5, ANK2 | Stroke |
| LINC02828 | Stroke |
| CDK6 | Stroke |
| LINC01394, AL034346.1 | Stroke |
| ABO, AL772161.2 | Stroke |
| FGA, FGB | Stroke |
| PMF1-BGLAP, PMF1 | Stroke |
| PRPF8 | Stroke |
| AC010255.3 | Stroke |
| WNT2B | Stroke |
| RN7SL568P, CNOT6LP1 | Stroke |
| AC092720.1, AC092720.3 | Stroke |
| KCNK3 | Stroke |
| ZFHX3 | Stroke |
| LINC01438, PITX2 | Stroke |
| TTBK1, SLC22A7 | Stroke |
| BOLA3P1, RNU7-159P | Stroke |
| HDAC9, TWIST1 | Stroke |
| ILF3 | Stroke |
| SH3PXD2A, AL133355.1 | Stroke |
| TSPOAP1-AS1, AC004687.2, RNF43 | Stroke |
| SH2B3, ATXN2 | Stroke |
| RPS10P21, AL139003.1 | Stroke |
| AC017007.5, ANK2 | Stroke |
| AC078880.1, AC008125.1 | Stroke |
| CDK6 | Stroke |
| RN7SL363P, FURIN | Stroke |
| LINC01394, AL034346.1 | Stroke |
| HTRA1 | Stroke |
| ABO, AL772161.2 | Stroke |
| PTPRF | Stroke |
| HDAC9, TWIST1 | Large artery stroke |
| CWF19L2, ALKBH8 | Large artery stroke |
| LINC02113, GUSBP8 | Large artery stroke |
| TTLL5 | Large artery stroke |
| CDKN2B-AS1 | Large artery stroke |
| AL136140.2, AL133334.1 | Large artery stroke |
| TMEM63C, AC007375.2, ZDHHC22 | Large artery stroke |
| RPL21P111, OBI1 | Large artery stroke |
| TMEM163 | Large artery stroke |
| CACNB2 | Small vessel stroke |
| AC092720.1, AC092720.3 | Small vessel stroke |
| CDKN2B-AS1 | Coronary artery disease or large artery stroke |
| LPA | Coronary artery disease or large artery stroke |
| HDAC9, TWIST1 | Coronary artery disease or large artery stroke |
| SMARCA4 | Coronary artery disease or large artery stroke |
| PHACTR1 | Coronary artery disease or large artery stroke |
| ATXN2-AS, BRAP | Coronary artery disease or large artery stroke |
| PSRC1, CELSR2 | Coronary artery disease or large artery stroke |
| TCF21 | Coronary artery disease or large artery stroke |
| EDNRA, PRMT5P1 | Coronary artery disease or large artery stroke |
| PLPP3, AC119674.2 | Coronary artery disease or large artery stroke |
| WDR12 | Coronary artery disease or large artery stroke |
| AC020558.5, SMCR2 | Coronary artery disease or large artery stroke |
| ZC3HC1, AC073320.2 | Coronary artery disease or large artery stroke |
| ZPR1 | Coronary artery disease or large artery stroke |
| CNNM2 | Coronary artery disease or large artery stroke |
| AC022748.2, CHRNB4 | Coronary artery disease or large artery stroke |
| ABO, AL772161.2 | Coronary artery disease or large artery stroke |
| AC022335.1, SLCO1B1 | Ischemic stroke (large artery atherosclerosis) |
| FAF1 | Ischemic stroke (large artery atherosclerosis) |
| CDKN2C | Ischemic stroke (large artery atherosclerosis) |
| HDAC9 | Large artery stroke |
| TOM1L1 | Large artery stroke |
| AC113386.1 | Large artery stroke |
| LINC02488, AC018754.1 | Large artery stroke |
| RGS9, LINC02563 | Large artery stroke |
| PARK7 | Ischemic stroke |
| SHISA6 | Ischemic stroke |
| NAA25 | Ischemic stroke |
| LINC01438, PITX2 | Ischemic stroke |
| AL034417.3 | Ischemic stroke |
| SPSB4 | Ischemic stroke |
| PHACTR1 | Coronary artery disease or ischemic stroke |
| ZC3HC1, AC073320.2 | Coronary artery disease or ischemic stroke |
| ABO, AL772161.2 | Coronary artery disease or ischemic stroke |
| AC022748.3, AC022748.2 | Coronary artery disease or ischemic stroke |
| PSRC1, CELSR2 | Coronary artery disease or ischemic stroke |
| SMCR2, AC020558.5 | Coronary artery disease or ischemic stroke |
| WDR12 | Coronary artery disease or ischemic stroke |
| TCF21 | Coronary artery disease or ischemic stroke |
| PLPP3, AC119674.2 | Coronary artery disease or ischemic stroke |
| LINC01626, AL035467.2 | Coronary artery disease or ischemic stroke |
| CDKN2B-AS1 | Coronary artery disease or ischemic stroke |
| ATXN2-AS, BRAP | Coronary artery disease or ischemic stroke |
| LPA | Coronary artery disease or ischemic stroke |
| SMARCA4 | Coronary artery disease or ischemic stroke |
| KNG1, AC068631.1 | Thrombosis |
| F2 | Thrombosis |
| LRAT, FGG | Thrombosis |
| F5 | Thrombosis |
| FUNDC2 | Thrombosis |
| SLC44A2 | Thrombosis |
| PROCR | Thrombosis |
| COX7A2L | Thrombosis |
| TSPAN15 | Thrombosis |
| AL357518.2, AL357518.1 | Thrombosis |
| GAPDHP50, ICE2P2 | Thrombosis |
| ABO | Thrombosis |
| F11-AS1 | Thrombosis |
| AL136140.2, AL133334.1 | Stroke (ischemic) |
| LINC01765, AL049825.1 | Ischemic stroke (large artery atherosclerosis) |
| HDAC9 | Ischemic stroke (large artery atherosclerosis) |
| F11-AS1 | Ischemic stroke (cardioembolic) |
| CAV2 | Ischemic stroke (cardioembolic) |
| ABO, AL772161.2 | Ischemic stroke (cardioembolic) |
| AL023495.1 | Ischemic stroke (cardioembolic) |
| BNIP1, RPL7AP33 | Ischemic stroke (cardioembolic) |
| NEURL1 | Ischemic stroke (cardioembolic) |
| HK1 | Ischemic stroke (cardioembolic) |
| ZFHX3 | Ischemic stroke (cardioembolic) |
| LINC01438, PITX2 | Ischemic stroke (cardioembolic) |
| AC011029.1, HNF4G | Ischemic stroke (cardioembolic) |
| ZFHX3 | Ischemic stroke (cardioembolic) |
| LINC01438, PITX2 | Ischemic stroke (cardioembolic) |
| RGS7 | Ischemic stroke (cardioembolic) |
| ABO, AL772161.2 | Ischemic stroke (cardioembolic) |
| BNIP1, RPL7AP33 | Ischemic stroke (cardioembolic) |
| NBEAL1 | Ischemic stroke (small-vessel) |
| CAMK2D | Ischemic stroke (small-vessel) |
| COL4A2 | Ischemic stroke (small-vessel) |
| CASZ1 | Ischemic stroke (small-vessel) |
| PMF1-BGLAP, PMF1 | Ischemic stroke (small-vessel) |
| AC010255.3 | Ischemic stroke (small-vessel) |
| SH3PXD2A, AL133355.1 | Ischemic stroke (small-vessel) |
| SH2B3, ATXN2 | Ischemic stroke (small-vessel) |
| AC092720.1, AC092720.3 | Ischemic stroke (small-vessel) |
| LINC01394, AL034346.1 | Ischemic stroke (small-vessel) |
| AC092720.1, AC092720.3 | Ischemic stroke (small-vessel) |
| LINC01492 | Ischemic stroke (large artery atherosclerosis) |
| AL049825.1, LINC01765 | Ischemic stroke (large artery atherosclerosis) |
| AC093908.1, EDNRA | Ischemic stroke (large artery atherosclerosis) |
| HDAC9, TWIST1 | Ischemic stroke (large artery atherosclerosis) |
| MMP12, MMP3 | Ischemic stroke (large artery atherosclerosis) |
| AC108751.2, AC108751.3 | Ischemic stroke (large artery atherosclerosis) |
| LINC01492 | Ischemic stroke (large artery atherosclerosis) |
| AL049825.1, LINC01765 | Ischemic stroke (large artery atherosclerosis) |
| FARP1 | Ischemic stroke (large artery atherosclerosis) |
| AC093908.1, EDNRA | Ischemic stroke (large artery atherosclerosis) |
| HDAC9, TWIST1 | Ischemic stroke (large artery atherosclerosis) |
| SH2B3, ATXN2 | Ischemic stroke (large artery atherosclerosis) |
| AL109933.2 | Ischemic stroke (large artery atherosclerosis) |
| MMP12, MMP3 | Ischemic stroke (large artery atherosclerosis) |
| CDKN2B-AS1 | Stroke |
| SMARCA4 | Stroke |
| CASZ1 | Stroke |
| LRCH1 | Stroke |


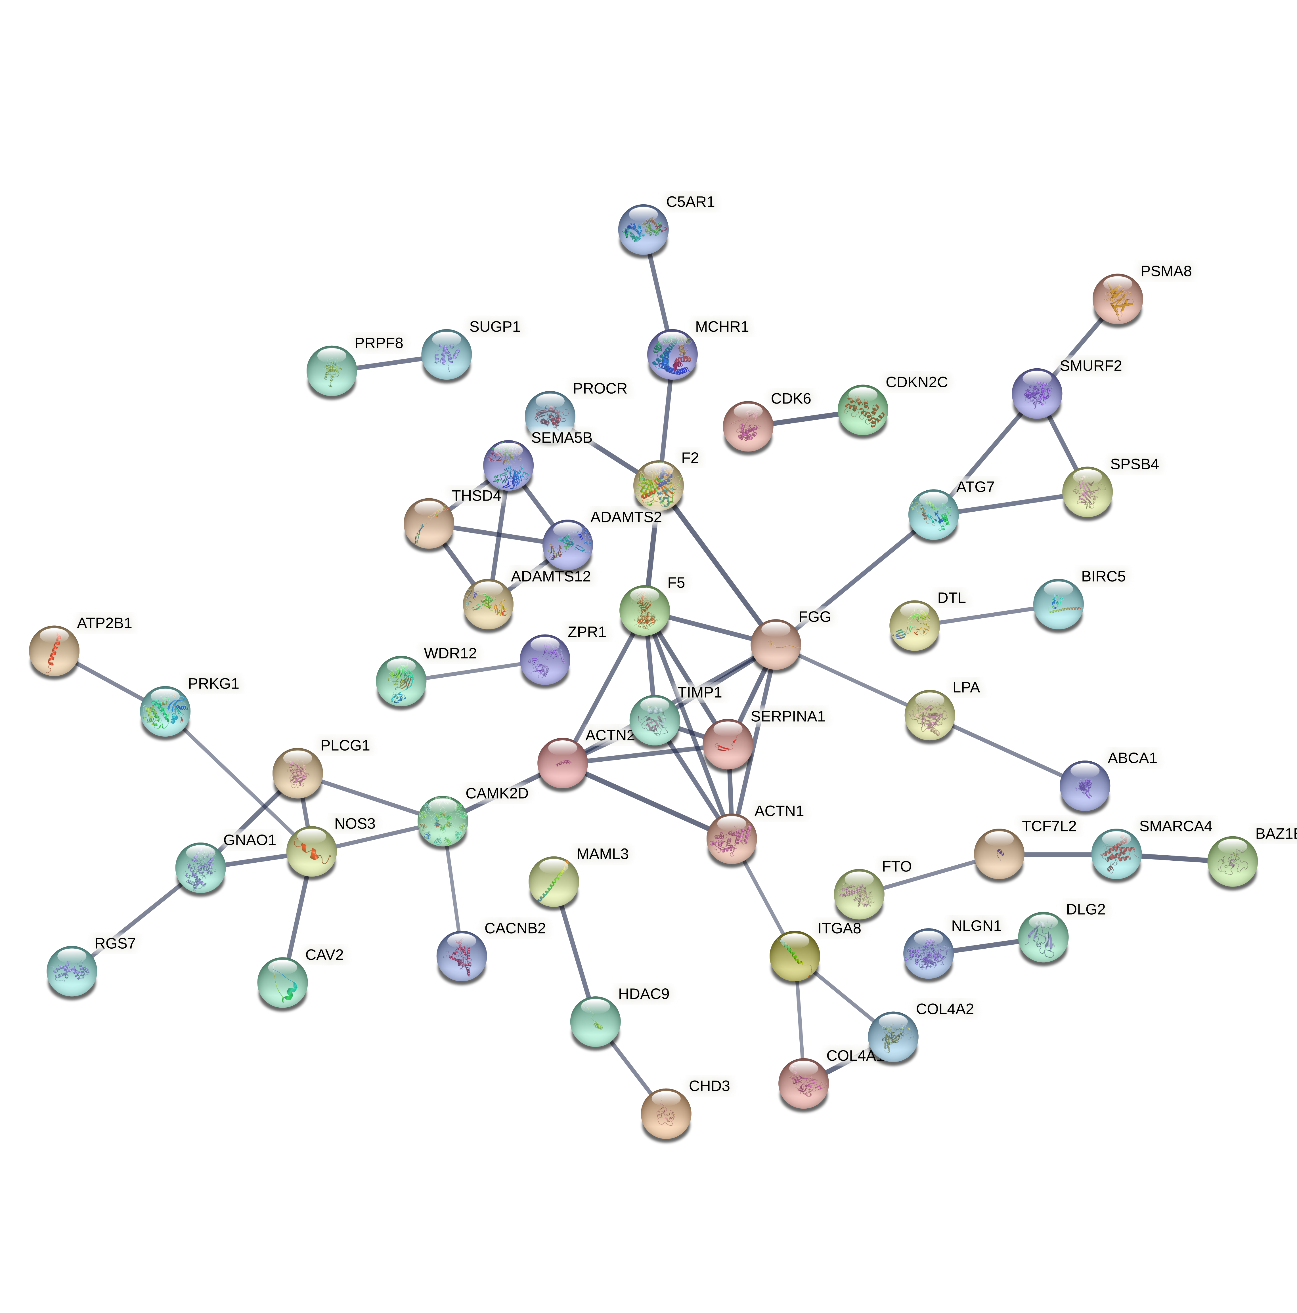


Appendix S3. PPI Network with confidence cut-off of 0.7.

number of nodes: 148

number of edges: 58

average node degree: 0.784

avg. local clustering coefficient: 0.243

expected number of edges: 41

PPI enrichment p-value: 0.00751

Appendix S4. Reactome pathways analysis results

| Pathway | Description | Count in Network | Strength | False Discovery Rate |
| --- | --- | --- | --- | --- |
| HSA-140875 | Common Pathway of Fibrin Clot Formation | 4 of 22 | 1.38 | 0.0211 |
| HSA-442729 | CREB phosphorylation through the activation of CaMKII | 3 of 18 | 1.34 | 0.0328 |
| HSA-442982 | Ras activation upon Ca2+ influx through NMDA receptor | 3 of 20 | 1.3 | 0.0384 |
| HSA-438066 | Unblocking of NMDA receptors, glutamate binding and activation | 3 of 20 | 1.3 | 0.0384 |
| HSA-5083635 | Defective B3GALTL causes Peters-plus syndrome (PpS) | 4 of 37 | 1.16 | 0.0262 |
| HSA-5173214 | O-glycosylation of TSR domain-containing proteins | 4 of 38 | 1.14 | 0.0262 |
| HSA-114608 | Platelet degranulation | 7 of 125 | 0.87 | 0.0211 |
| HSA-76002 | Platelet activation, signaling and aggregation | 8 of 256 | 0.62 | 0.0418 |
| HSA-109582 | Hemostasis | 15 of 601 | 0.52 | 0.0211 |
